# Supplementary material
Source: publisher figshare collection journal article supplement (https://acs.figshare.com/ndownloader/files/4735900)
Supplement: Supplementary file 1 [file 4735900]

## Supplementary material

NMR measurements were made with a 400 MHz Bruker Avance DPX-400 and a 400 MHz Jeol JNM-GX 400. Deuterated solvents were dried by conventional methods, stored under molecular sieves and degassed prior to use.

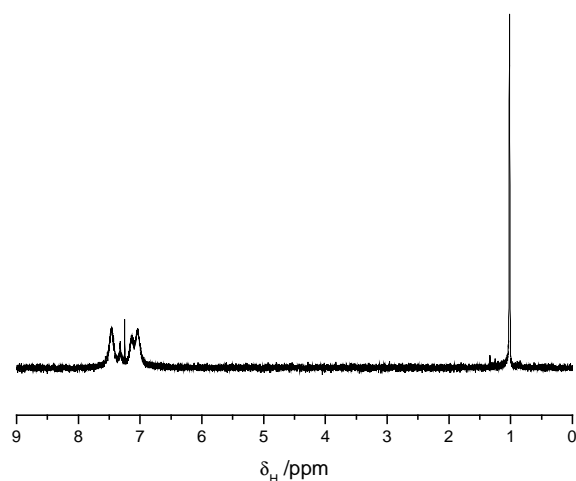

Fig. 1s –  $^1\text{H}$ -NMR of  $\text{Cp}^*\text{RuCl}(\text{PPh}_3)_2$  (complex **7**) in  $\text{CDCl}_3$  at RT.

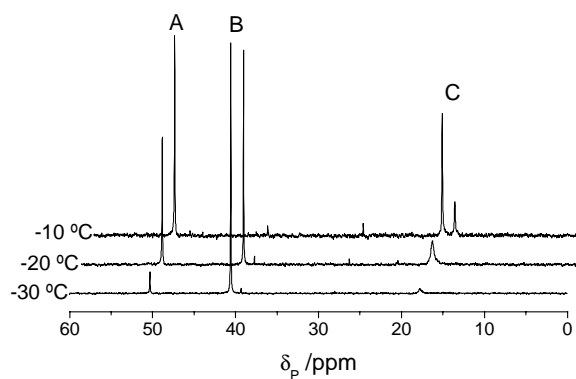

Fig. 2s –  $^{31}\text{P}$ -NMR of the formation of complex **8**.  
A. Complex **8**; B. Complex **7**; C. Phosphorus ylide.

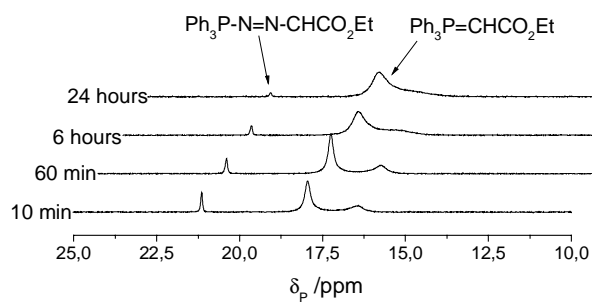

Fig. 3s –  $^{31}\text{P}$ -NMR of the catalysis in the absence of aldehyde.

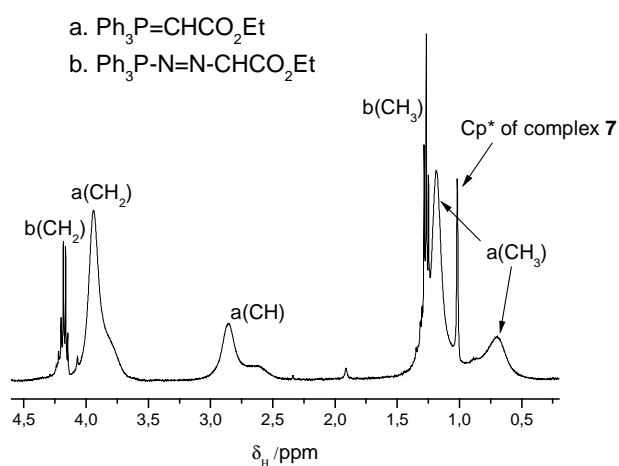

Fig. 4s -  $^1\text{H}$ -NMR of the catalysis in the absence of aldehyde, after 5 min of reaction time (aromatic region excluded). The ratio phosphorus ylide/ phosphazine was determined by integration of the  $\text{CH}_2$  peaks of each product.

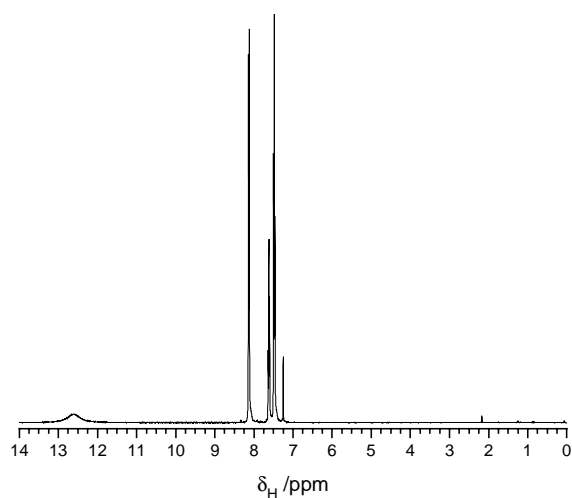

Fig. 5s –  $^1\text{H}$ -NMR of benzoic acid in  $\text{CDCl}_3$  at RT.
